# Supplementary material for: Novel Multifunctional Ascorbic Triazole Derivatives for Amyloidogenic Pathway Inhibition, Anti-Inflammation, and Neuroprotection
Source: MDPI journal article supplement (doi:10.3390/molecules26061562), 2021-03-12
Supplement: s1 [file s1]

# Novel Multifunctional Ascorbic Triazole Derivatives for Amyloidogenic Pathway Inhibition, Anti-inflammation, and Neuroprotection

## 1. Synthesis

The percent yields of synthesized compounds were report in **table S1**. The  $^1\text{H}$ -NMR and  $^{13}\text{C}$ -NMR spectrums of final synthesized compounds were shown in figures **S1-S12**.

**Table S1.** The percent yields and structures of synthesized compounds.

| Compound | Structure                                                                           | % yield |
|----------|-------------------------------------------------------------------------------------|---------|
| 2        | 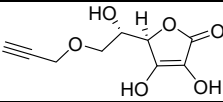   | 29.00   |
| 3        |    | 65.88   |
| 4        |    | 51.13   |
| 5        |   | 86.14   |
| a        |  | 16.15   |
| b        |  | 13.51   |
| In-c1    |  | 99.64   |
| In-c2    |  | 58.32   |
| In-c4    |  | 78.28   |
| c        |  | 41.19   |
| 2a       |  | 8.58    |
| 2b       |  | 12.30   |
| 2c       |  | 24.52   |

**Table S1.** The percent yields and structures of synthesized compounds (cont.).

| Compound | Structure                                                                         | % yield |
|----------|-----------------------------------------------------------------------------------|---------|
| 5a       | 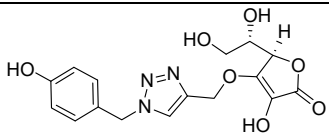 | 13.70   |
| 5b       |  | 24.61   |
| 5c       |  | 13.32   |

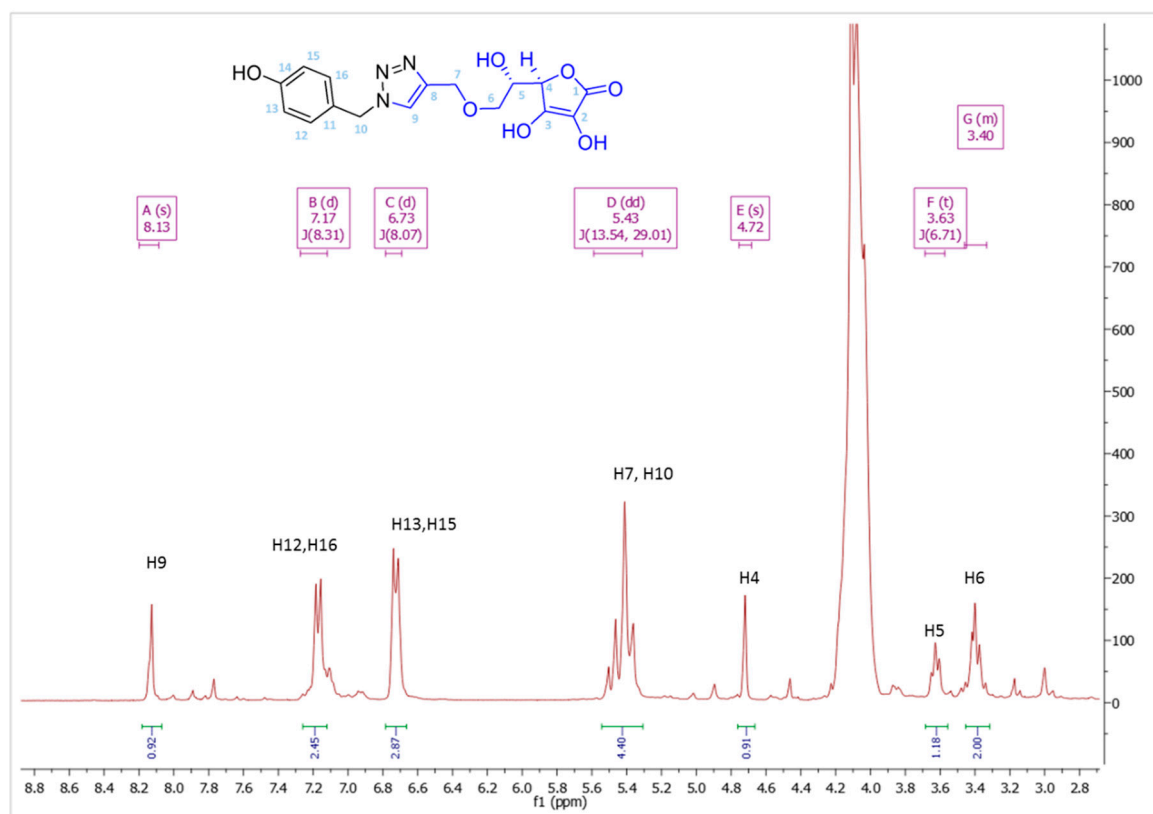**Figure S1.** <sup>1</sup>H NMR spectrum (300 MHz) of compound [2a] in DMSO-d<sub>6</sub>.

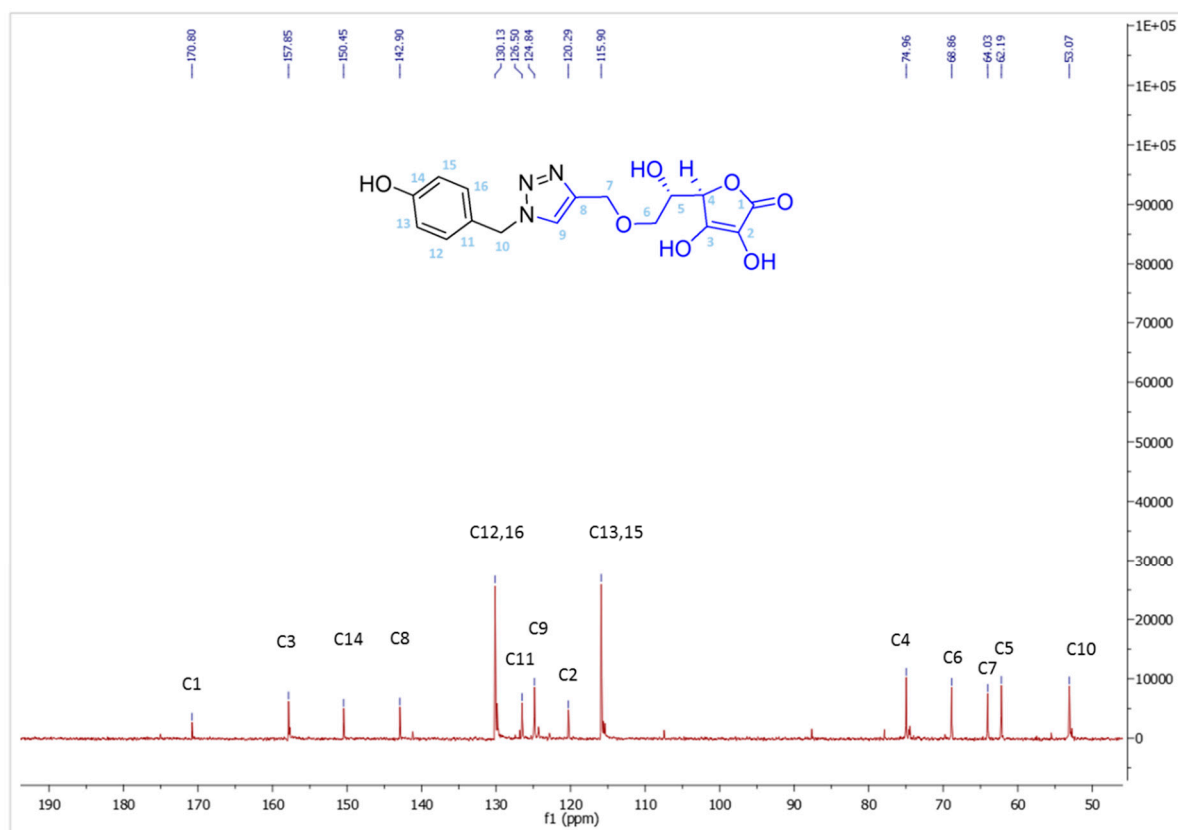

Figure S2.  $^{13}\text{C}$ NMR spectrum (300 MHz) of compound [2a] in DMSO- $d_6$ .

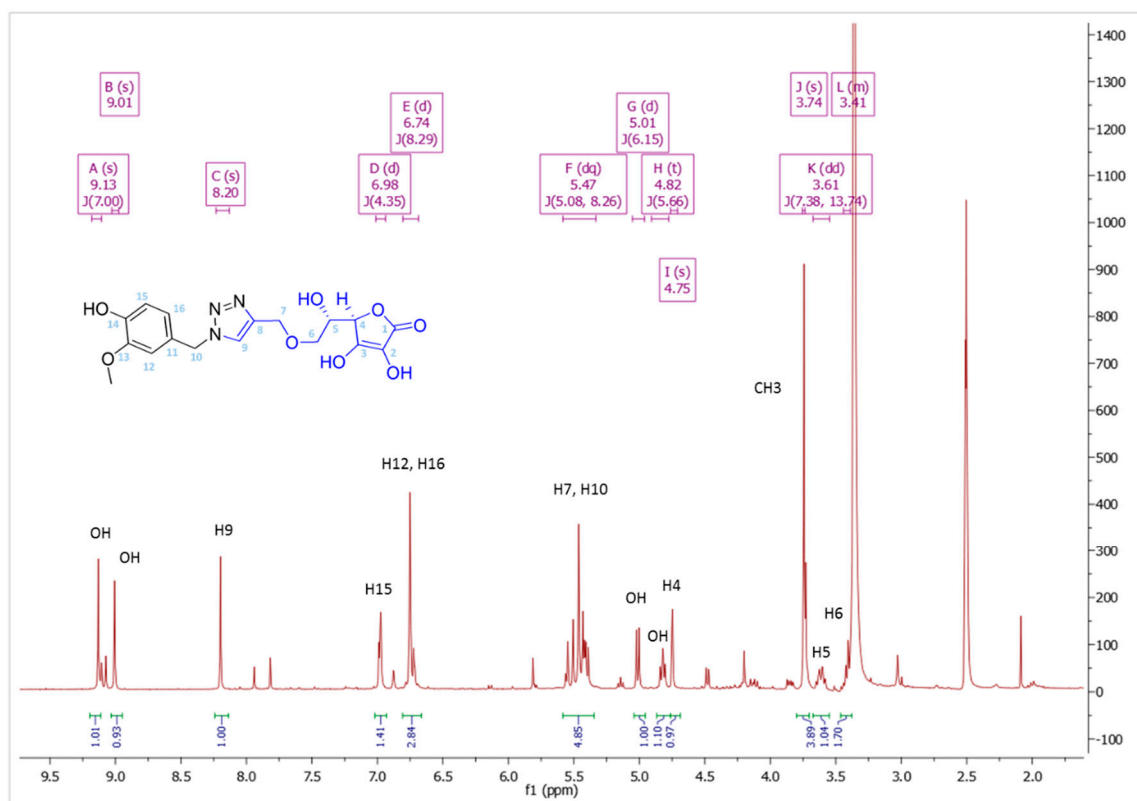

Figure S3.  $^1\text{H}$ NMR spectrum (300 MHz) of compound [2b] in DMSO- $d_6$ .

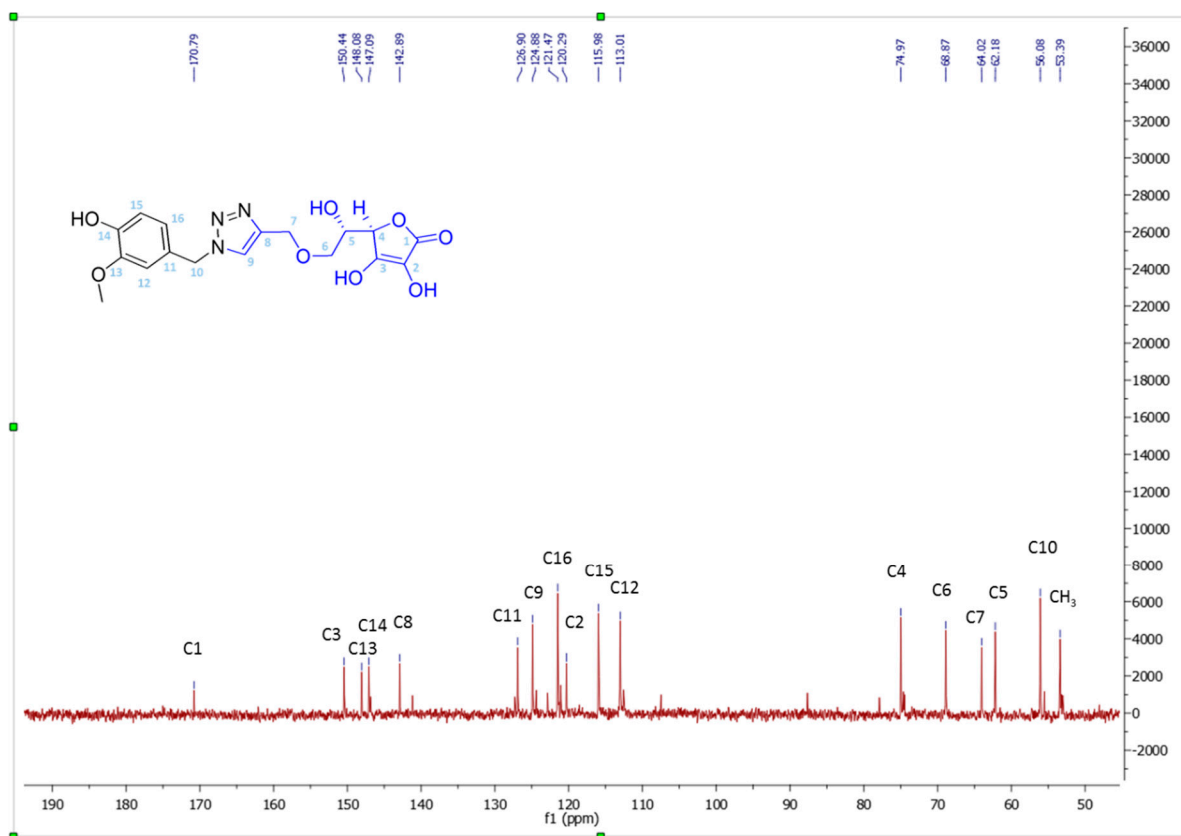

Figure S4.  $^{13}\text{C}$ NMR spectrum (300 MHz) of compound [2b] in  $\text{DMSO-d}_6$ .

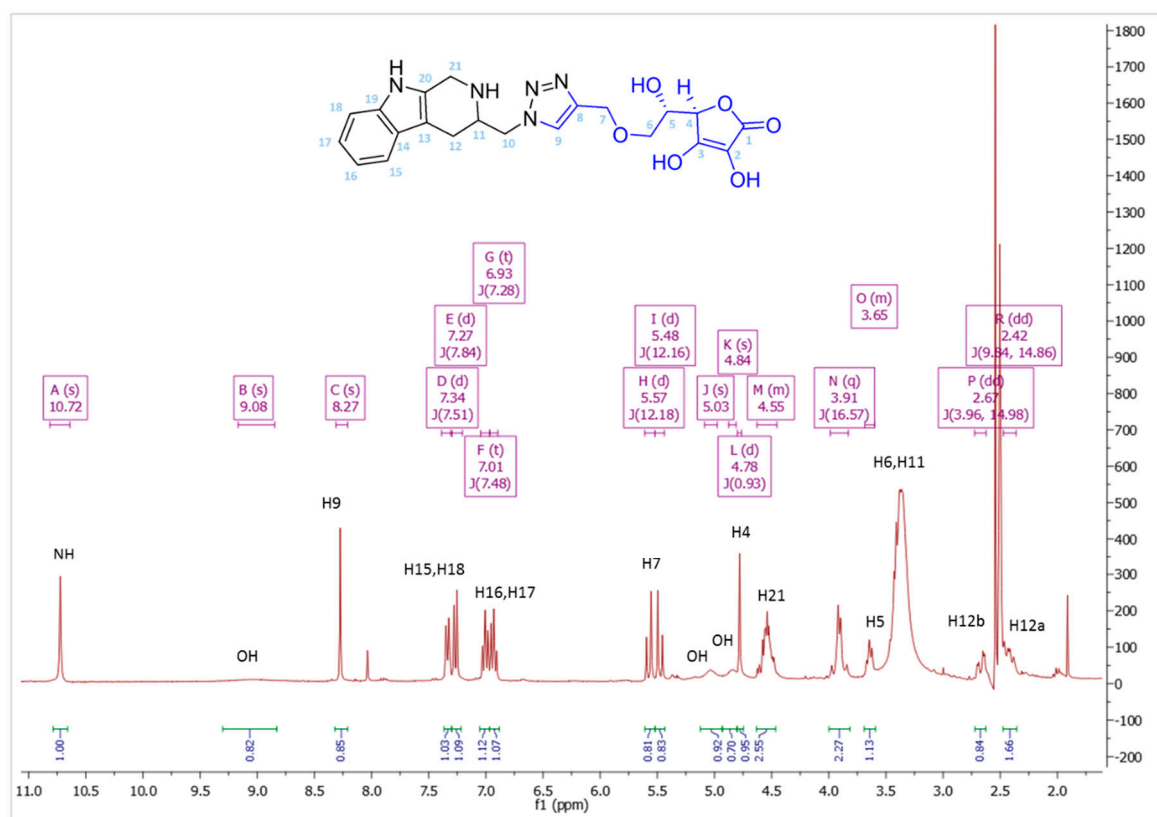

Figure S5.  $^1\text{H}$ NMR spectrum (300 MHz) of compound [2c] in  $\text{DMSO-d}_6$ .

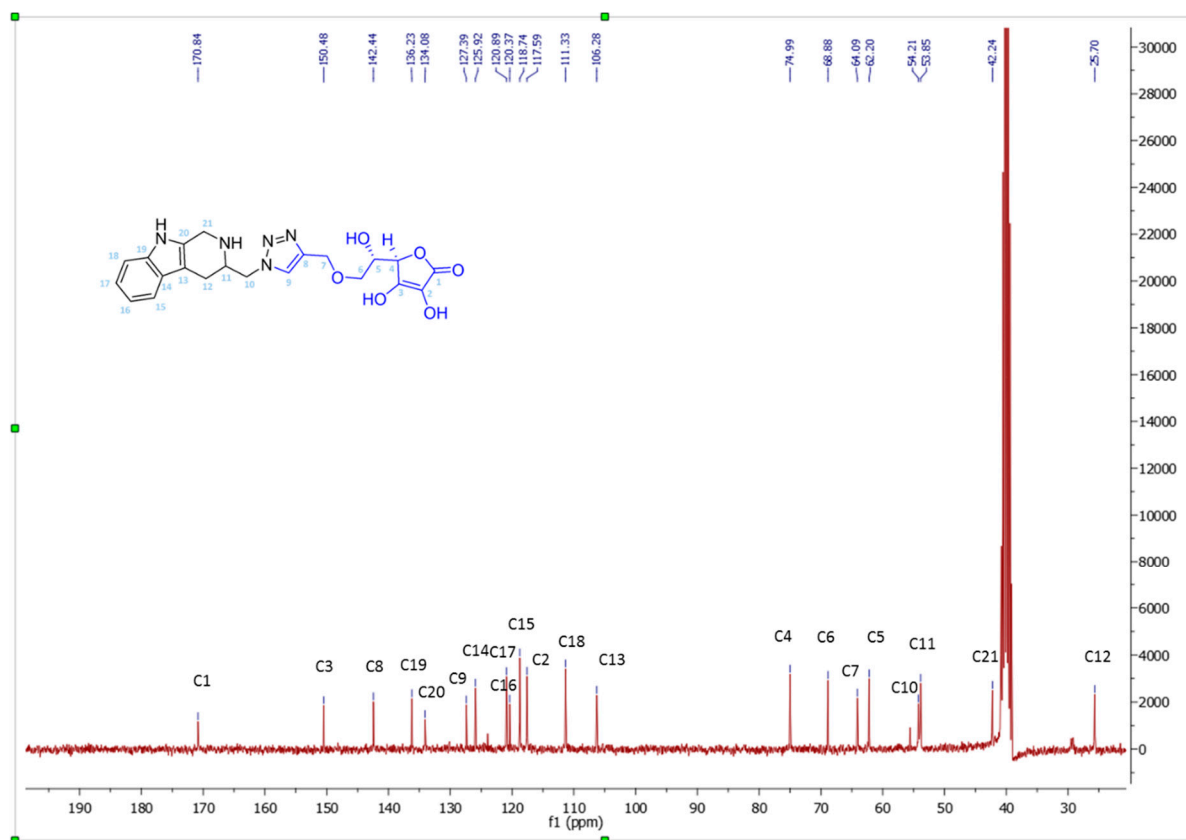

**Figure S6.**  $^{13}\text{C}$ NMR spectrum (300 MHz) of compound [2c] in  $\text{DMSO-d}_6$ .

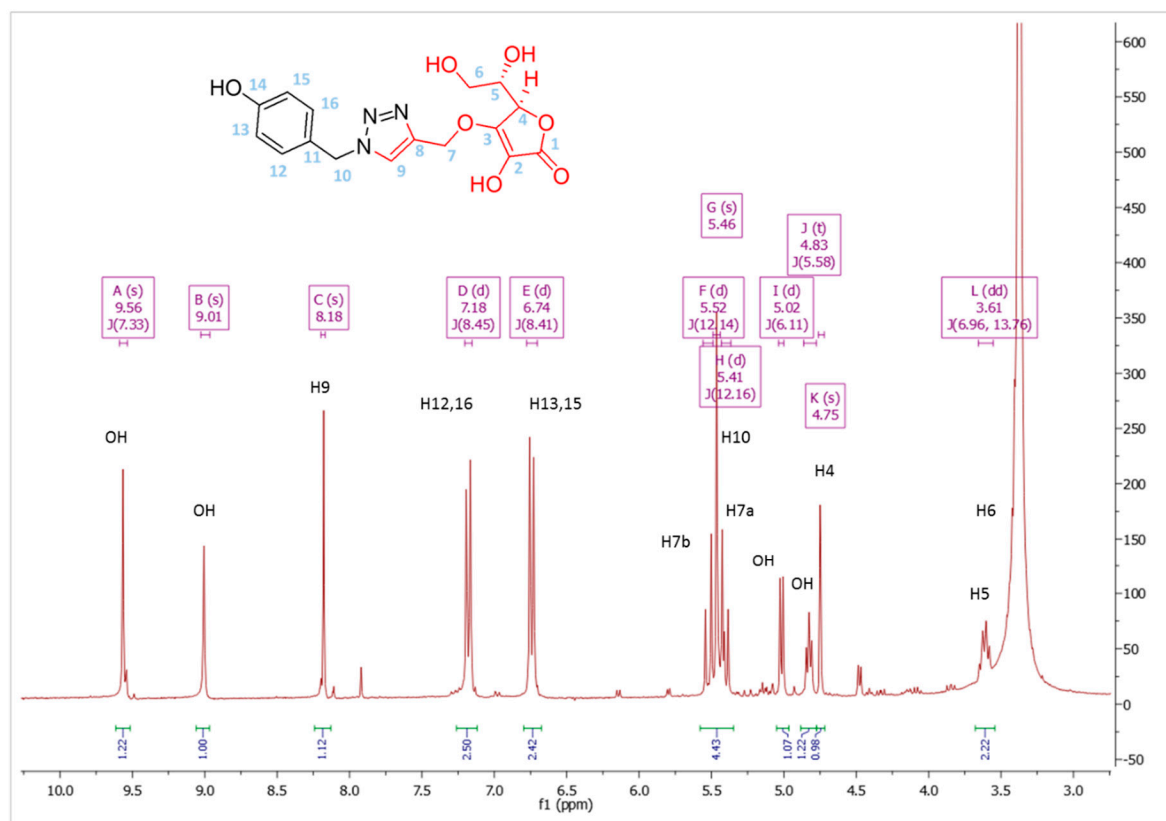

Figure S7.  $^1\text{H}$ NMR spectrum (300 MHz) of compound [5a] in DMSO- $d_6$ .

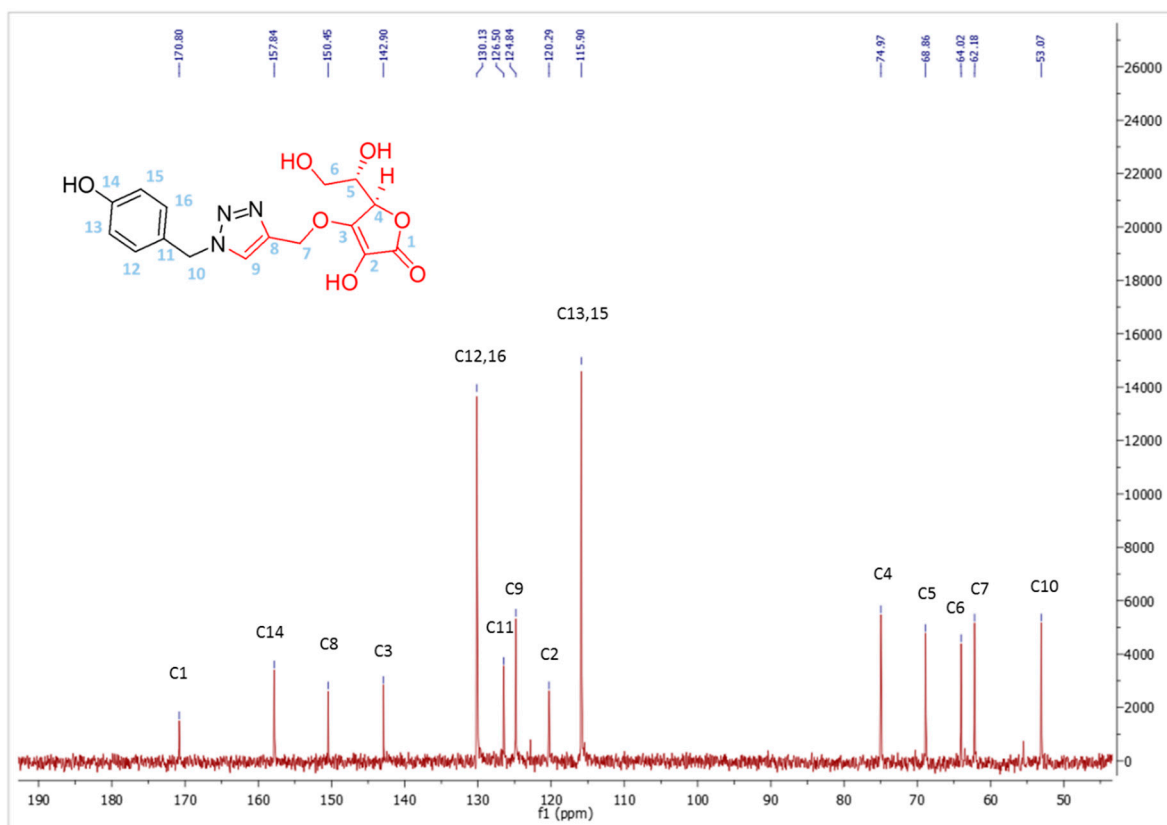

Figure S8.  $^{13}\text{C}$ NMR spectrum (300 MHz) of compound [5a] in DMSO- $d_6$ .

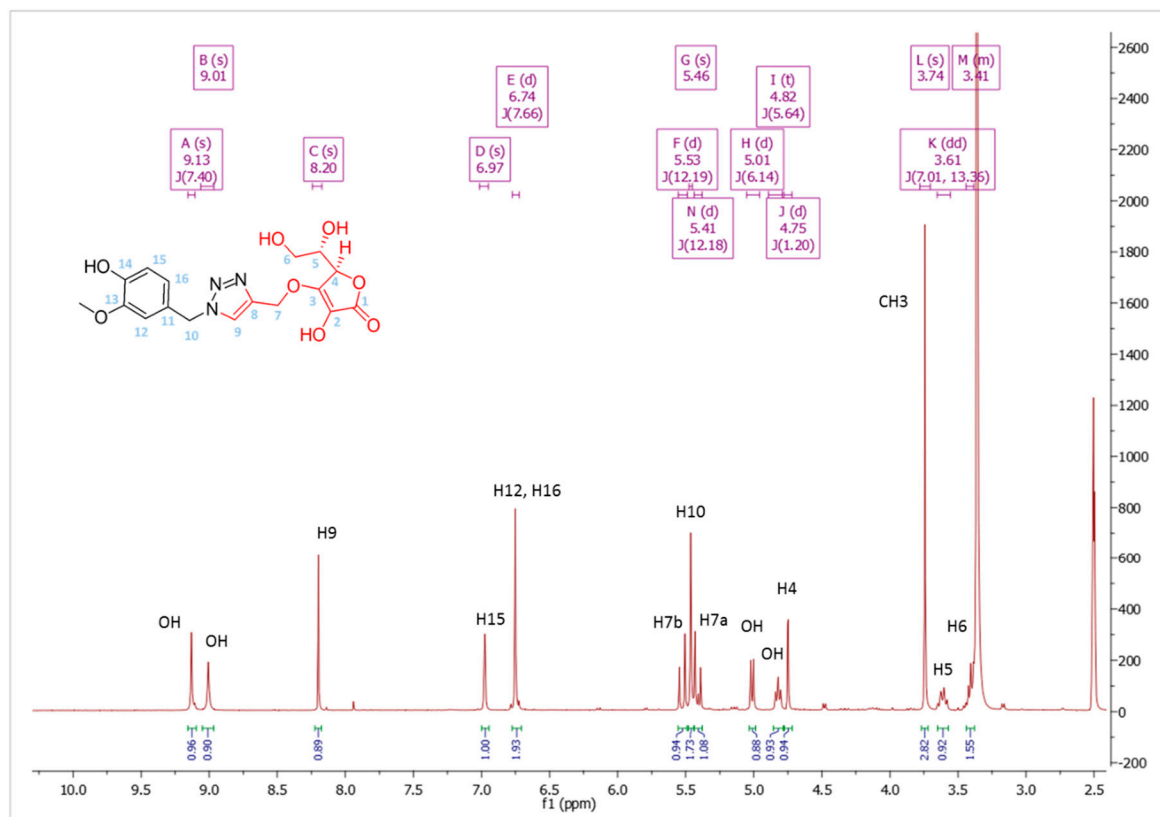

Figure S9.  $^1\text{H}$ NMR spectrum (300 MHz) of compound [5b] in DMSO- $d_6$ .

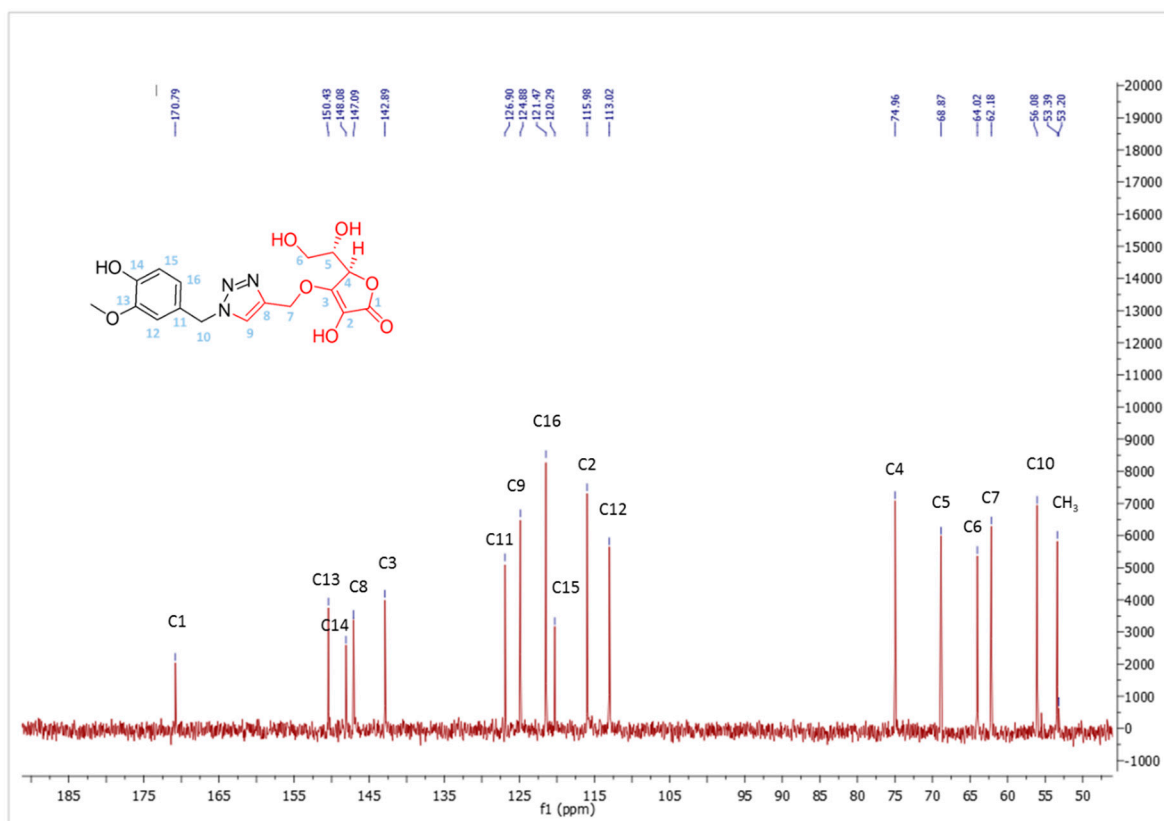

**Figure S10.**  $^{13}\text{C}$ NMR spectrum (300 MHz) of compound [5b] in  $\text{DMSO-d}_6$ .

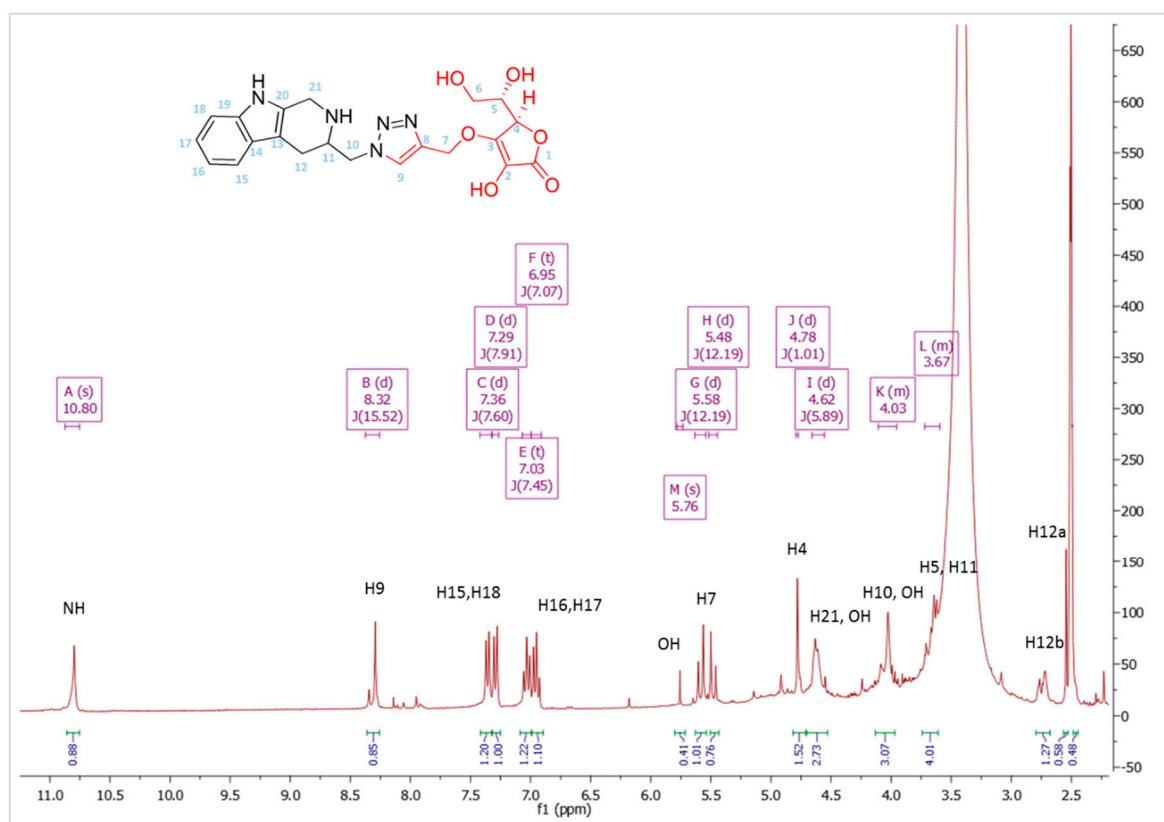

**Figure S11.**  $^1\text{H}$ NMR spectrum (300 MHz) of compound [5c] in  $\text{DMSO-d}_6$ .

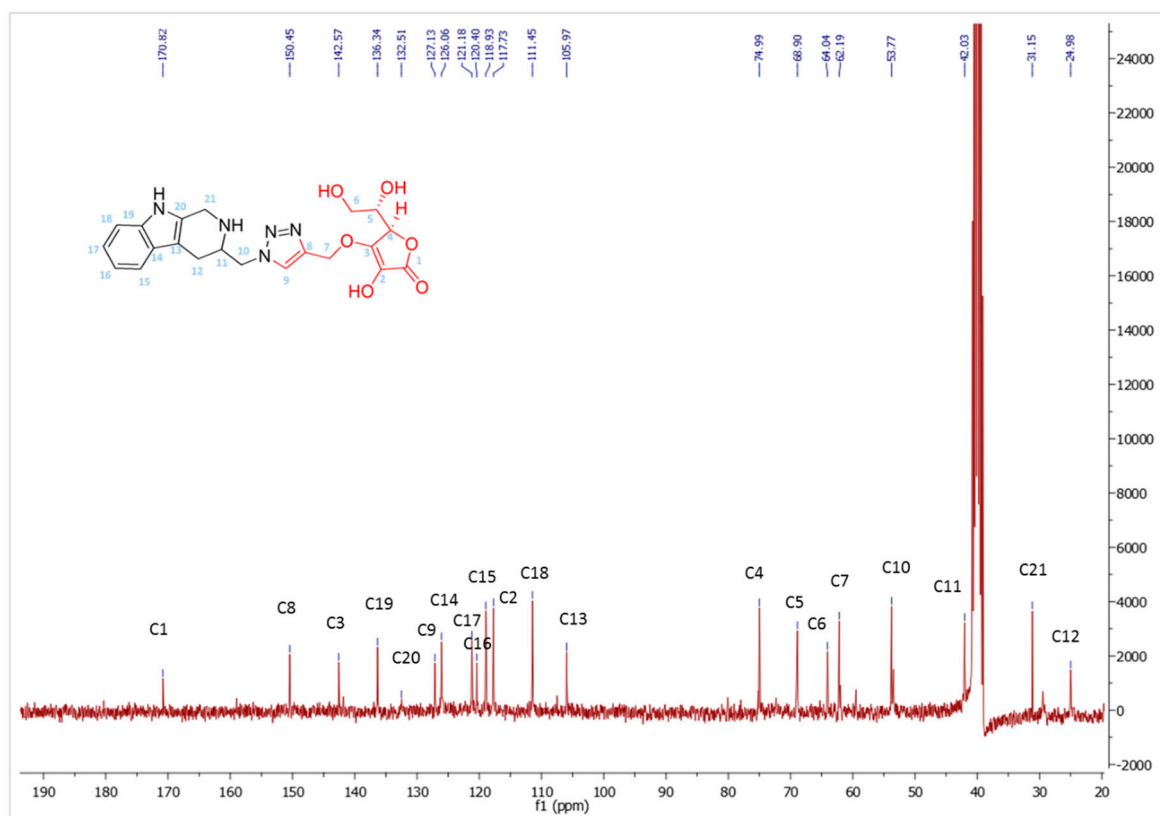

**Figure S12.**  $^{13}\text{C}$ NMR spectrum (300 MHz) of compound [5c] in  $\text{DMSO-d}_6$ .

## 2. Biological activity assays

Cell viability assays for neurotoxicity assessments of ascorbic acid and derivatives (**2a-2c** and **5a-5c**) were conducted at various concentrations of 1 to  $10^4$  nM on P19-derived neurons and measured by XTT method. All compounds except ascorbic acid had cell viabilities higher than 100% at 1 nM (Figure S13).

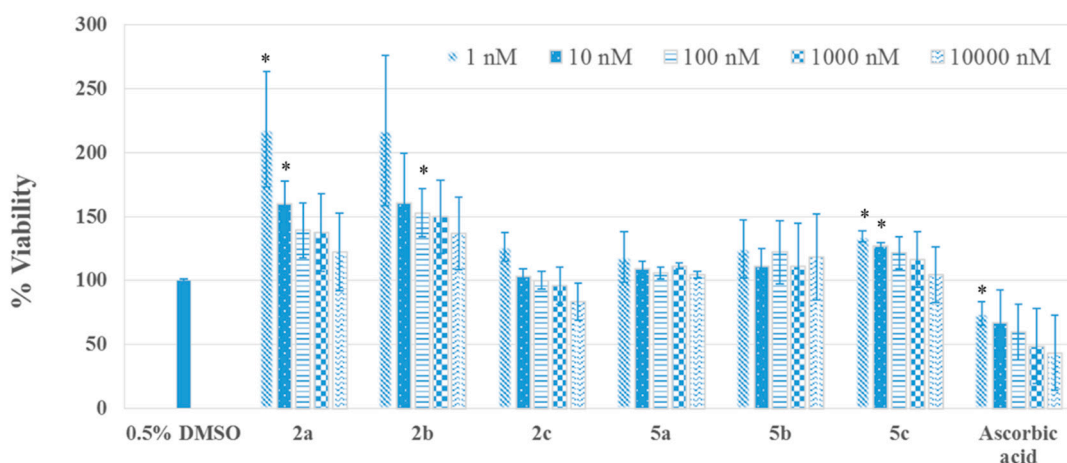

**Figure S13.** Effects of ascorbic acid and derivatives (**2a-2c** and **5a-5c**) at concentrations of 1 to  $10^4$  nM on the viability of P19-derived neurons. The cytotoxicity was evaluated by XTT assay. Each bar is presented as mean  $\pm$  SD ( $n = 3$ ). \* indicates significant differences with 0.5% DMSO (p-value < 0.05) based on t-test by using Microsoft Excel version 2013.



Cell viability assays for anti-inflammatory assessments of ascorbic acid, **2c**, and **5c** were performed at various concentrations of 0.001 to 100 nM on RAW 264.7 and measured by MTT method. The ascorbic acid, **2c**, and **5c** did not exhibit cytotoxicity after 24-hour exposure (Figure S14).

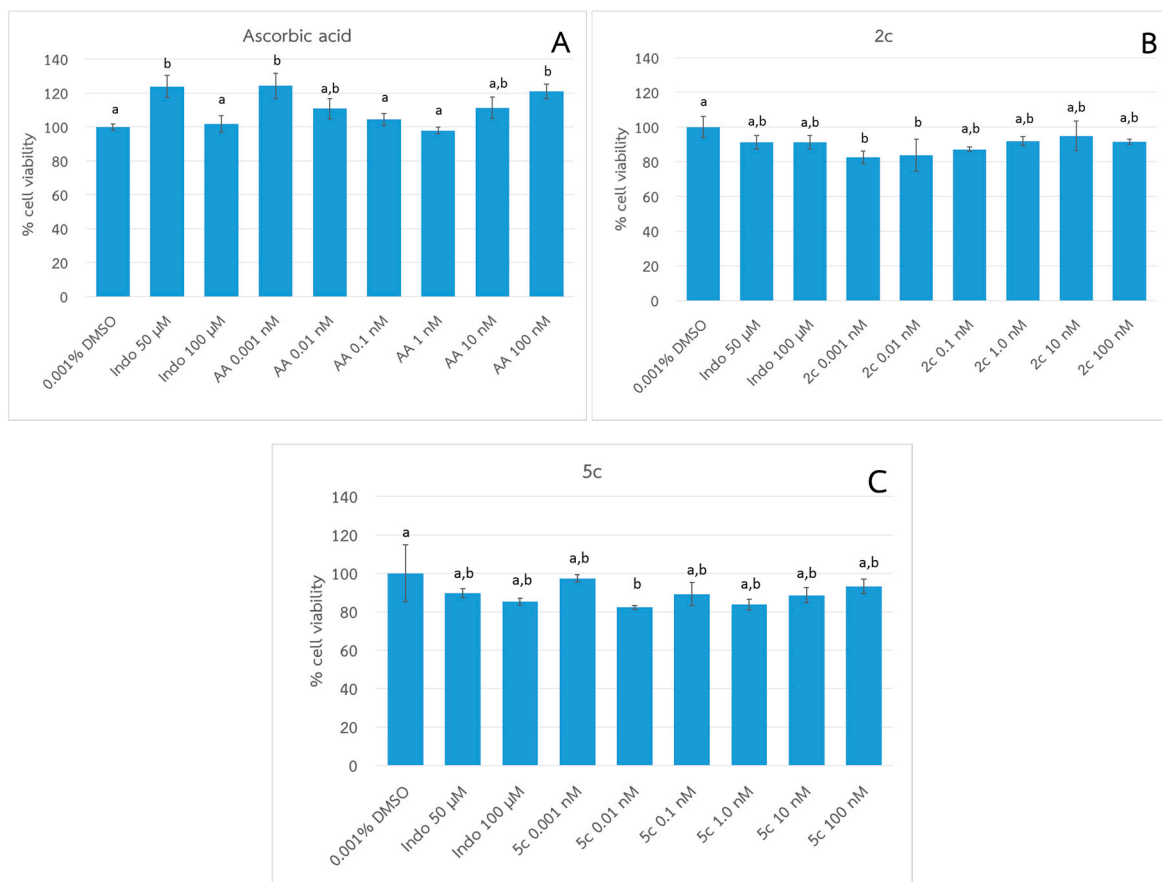

**Figure S14.** Effects of ascorbic acid (A), **2c** (B) and **5c** (C) on the viability of RAW 264.7. The cytotoxicity was evaluated by MTT assay. Each bar is presented as mean  $\pm$  SD ( $n = 3$ ). Letters (a and b) indicate significant differences ( $p$ -value  $< 0.05$ ) based on Tukey's HSD one-way ANOVA by using PAST version 3.14.
